# Supplementary material for: Enhanced photovoltaic performance utilizing effective charge transfers and light scattering effects by the combination of mesoporous, hollow 3D-ZnO along with 1D-ZnO in CdS quantum dot sensitized solar cells
Source: Royal Society of Chemistry journal article supplement (doi:10.1039/c3cp55276d), 2014-01-01
Supplement: c3cp55276d1.pdf [file c3cp55276d1.pdf]

## Electronic Supporting Information

### **Enhanced photovoltaic performance utilizing effective charge transfers and light scattering effects by the combination of mesoporous, hollow 3D-ZnO along with 1D-ZnO in CdS quantum dot sensitized solar cells**

Tridip Ranjan Chetia, Dipankar Barpuzary, Mohammad Qureshi\*  
Department of Chemistry, Indian Institute of Technology, Guwahati  
Assam, India - 781039

*\*Materials Science Laboratory, Department of Chemistry, Indian Institute of Technology, Guwahati, Assam, India – 781039.  
Fax: +91-3612582349; Tel: +91-361-2582320; E-mail: mq@iitg.ernet.in*

## 1. Morphology study of the photoanode films:

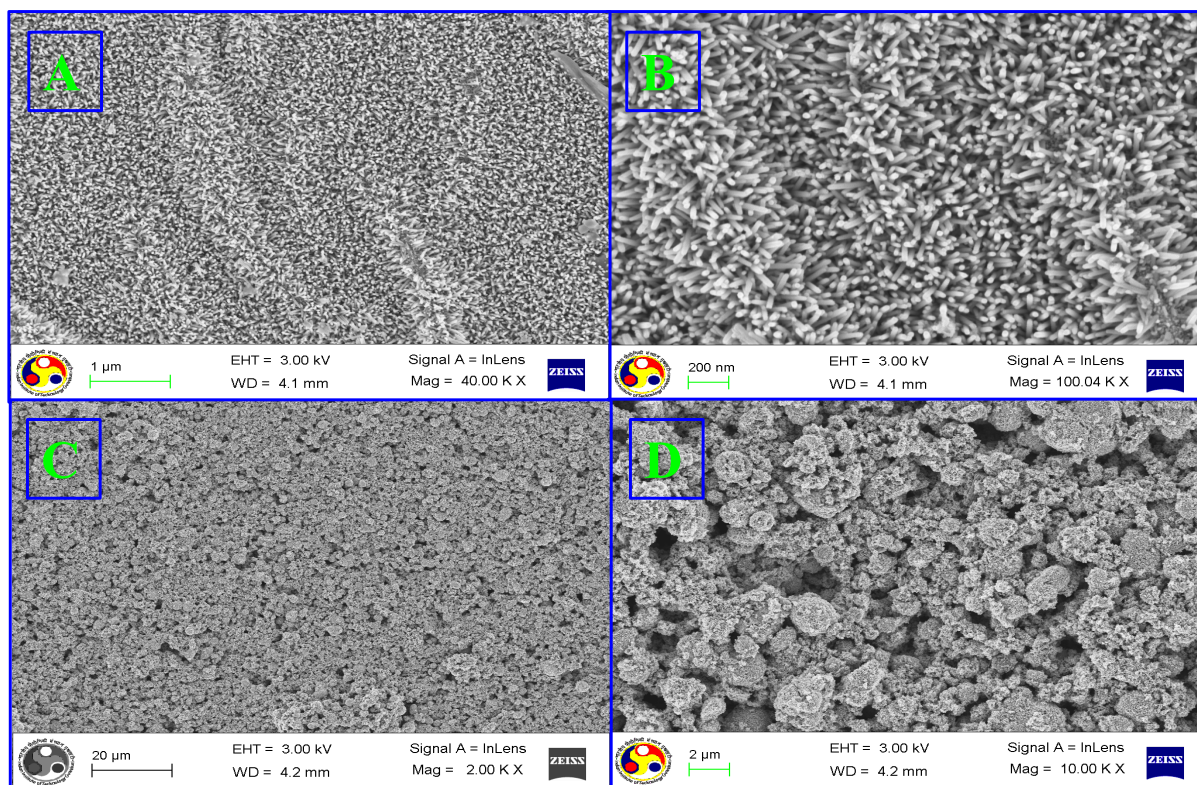

**Figure S1.** Field emission scanning electron microscopy (FESEM) images of **A. & B.** One dimensionally ZnO NWs grown on FTO substrates hydrothermally **C. & D.** Top view of ZnO HMSP layer deposited over it by doctor blade technique.

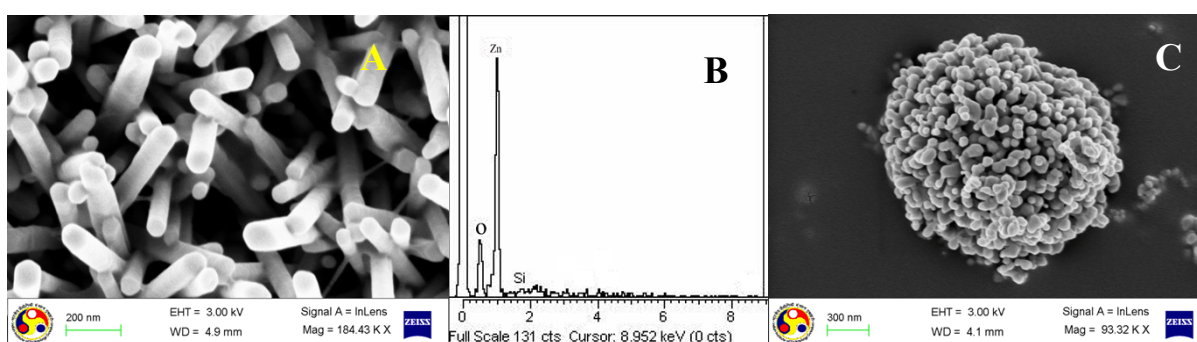

**Figure S2.** High magnification FESEM image and energy dispersive X-ray (EDX) analysis (**A & B**) of one dimensional ZnO NWs grown on FTO substrates hydrothermally. (**C**) High magnification FESEM image of a single ZnO HMSP.

## 2. XRD analysis of ZnO nanowires grown on glass substrates:

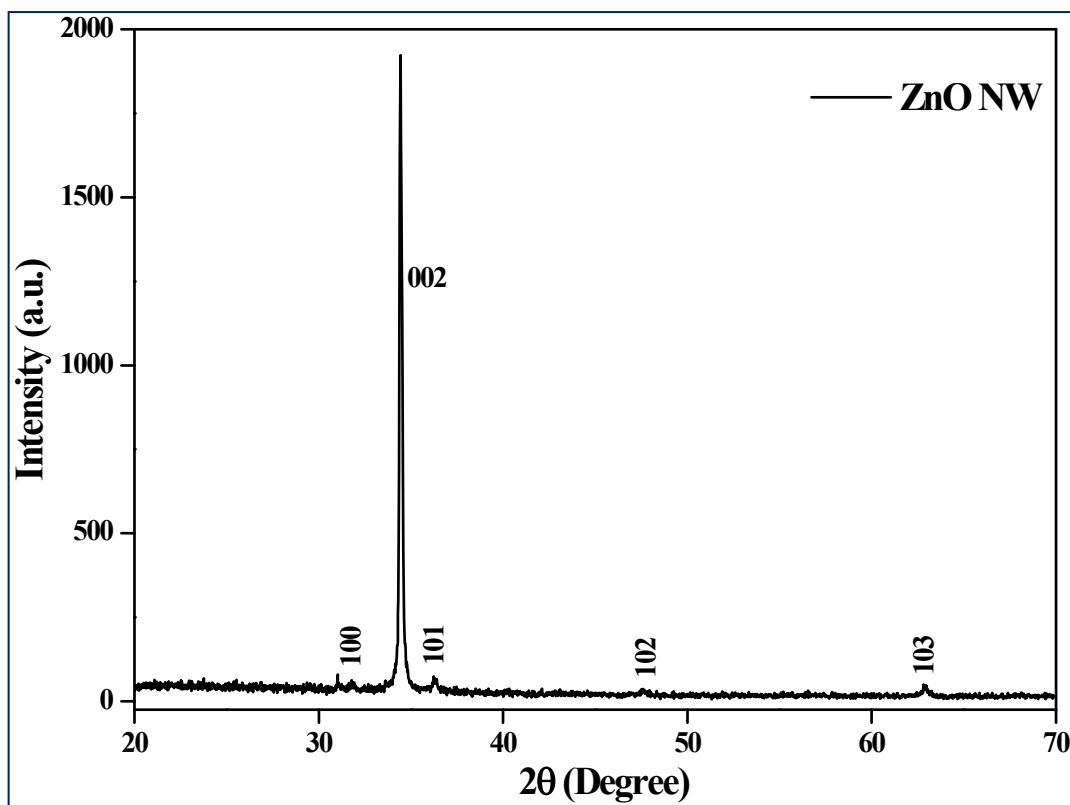

**Figure S3.** The XRD displays diffraction peaks of (100), (002), (101), (102), and (103) planes that correspond to the ZnO hexagonal wurtzite structure according to JCPDS Card No. 036-1451 and proving 1D growth of ZnO NW along the c-axis normal to the substrate.

### 3. TEM analysis of ZnO HMSP and CdS-sensitised ZnO HMSP:

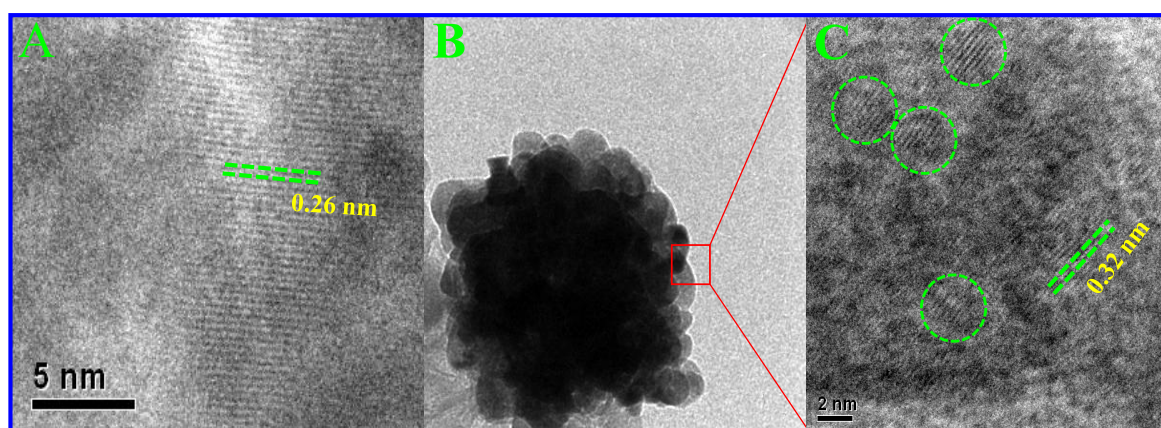

**Figure S4.** **A.** High resolution transmission electron microscopy (HRTEM) image of ZnO HMSP showing lattice pattern of single crystalline ZnO nanoparticles. **B.** TEM image of a CdS deposited ZnO HMSP. **C.** HRTEM image of the indicated portion of the microsphere showing lattice pattern of CdS QDs deposited over it.

#### 4. FESEM images of CdS sensitised ZnO HMSP:

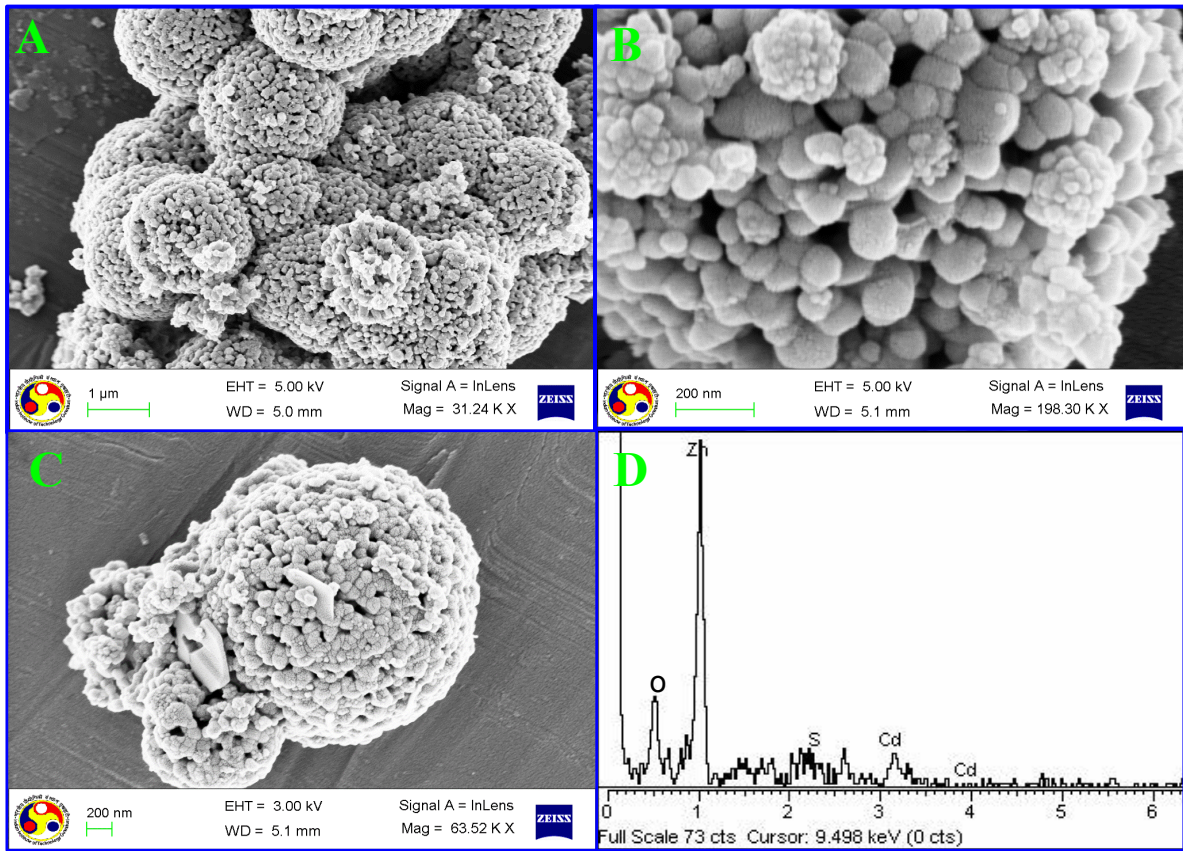

**Figure S5.** High- and low-magnification FESEM images of CdS sensitised ZnO microspheres scratched from the photoanodes. **A, B, C.** Magnified images of ZnO microspheres showing the available pores even after CdS sensitisation. **D.** Energy dispersive X-ray (EDX) analysis of CdS sensitised ZnO hollow microspheres.

#### 5. Tauc plots for ZnO NW–CdS, ZnO HMSP- CdS, ZnO NW-ZnO HMSP- CdS:

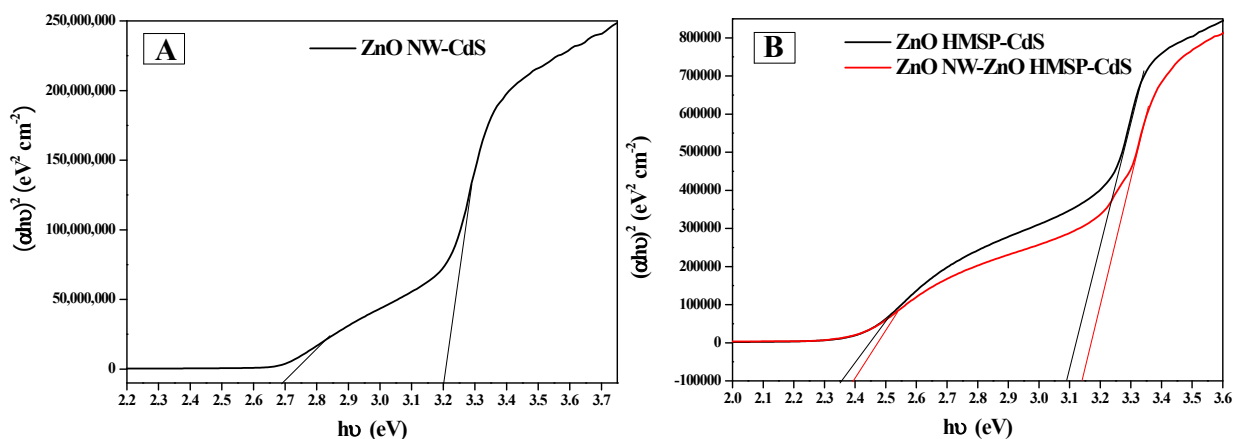

**Figure S6.** (A) Tauc plot for ZnO NW-CdS and (B) Tauc plots for ZnO HMSP-CdS and ZnO NW-ZnO HMSP-CdS.

| Photoanode          | Thickness ( $\mu\text{m}$ ) | Band Gap ZnO (eV) | Band Gap CdS (eV) |
|---------------------|-----------------------------|-------------------|-------------------|
| ZnO NW-CdS          | $\sim 1$                    | 3.2               | 2.69              |
| ZnO HMSP-CdS        | $\sim 14$                   | 3.09              | 2.35              |
| ZnO NW-ZnO HMSP-CdS | $\sim 1+14$                 | 3.14              | 2.39              |

**Table S1.** Optical band gap energy of ZnO and CdS estimated from the tauc plots of all the photoanodes.

## 6. Steady-state fluorescence spectra of pure CdS, ZnO NW and ZnO HMSP

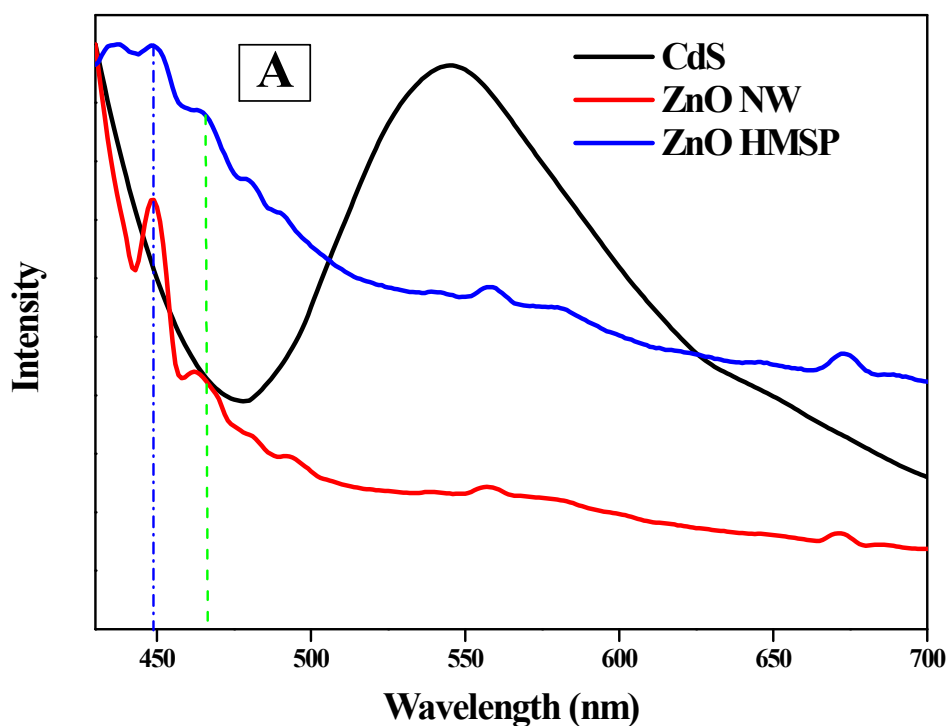

**Figure S7.** Steady-state fluorescence spectra of pure CdS, ZnO NW and ZnO HMSP excited at an wavelength of 410 nm.

**Table S2. Present scenario of ZnO based solar cells and their relevant performance parameters along with our result**

| Ref No. | ZnO Nanostructure                            | Sensitizer QDs | Counter electrode       | Cell Area (cm <sup>2</sup> ) | $J_{sc}$ (mA/cm <sup>2</sup> ) | $V_{oc}$ (mV) | $FF$ (%) | $\eta$ (%) |
|---------|----------------------------------------------|----------------|-------------------------|------------------------------|--------------------------------|---------------|----------|------------|
| 9       | ZnO NW                                       | CdSe           | Pt/FTO                  | No data                      | 2.1                            | 600           | 30       | 0.4        |
| 37      | Hierarchical tetrapod-like ZnO nanoparticles | CdS, CdSe      | Pt/FTO                  | 0.25                         | 13.85                          | 722           | 42.4     | 4.24       |
| 38      | ZnO NP                                       | CdS, CdSe      | Cu <sub>2</sub> S/Brass | 0.15                         | 10.48                          | 683           | 62.3     | 4.5        |
| 40      | ZnO NP-CdS-GO Composite                      | CdS            | Pt/FTO                  | 1.2                          | 7.3                            | 703           | 54.6     | 2.8        |
| SI 1.   | ZnO NWs                                      | CdS, CdSe      | Au/FTO                  | 0.25                         | 17.3                           | 627           | 38.3     | 4.2        |
| SI 2.   | ZnO NWs                                      | CdS,           | (MSU-F-                 | 0.25                         | 12.6                           | 690           | 42       | 3.6        |

|                     |                                                           |              |                         |          |             |            |           |            |
|---------------------|-----------------------------------------------------------|--------------|-------------------------|----------|-------------|------------|-----------|------------|
|                     |                                                           | CdSe         | C)/FTO                  |          |             |            |           |            |
| SI 3.               | ZnO NWs                                                   | CdS          | Pt/FTO                  | No data  | 5.42        | 580        | 34        | 1.1        |
| SI 4.               | ZnO NW(Core)/<br>Zn <sub>2</sub> SnO <sub>4</sub> (Shell) | CdS          | Pt/FTO                  | 0.25     | 3.68        | 760        | 44        | 1.3        |
| SI 5.               | ZnO NP (Surface passivated with TiO <sub>2</sub> shell)   | CdS,<br>CdSe | Cu <sub>2</sub> S/Brass | 0.25     | 15.4        | 620        | 49        | 4.7        |
| SI 6                | ZnO NW                                                    | CdS,<br>CdSe | Pt/ITO                  | No data  | 5.19        | 661        | 41.5      | 1.4        |
| SI 7                | ZnO NT                                                    | CdSe         | Pt/FTO                  | 0.2      | 2.09        | 440        | 41        | 0.4        |
| <b>Present work</b> | <b>ZnO NW/ZnO HMSP</b>                                    | <b>CdS</b>   | <b>Pt/FTO</b>           | <b>1</b> | <b>9.01</b> | <b>511</b> | <b>51</b> | <b>2.4</b> |

\*Mesocellular carbon foam

## References:

- SI 1. M. Seol, H. Kim, Y. Tak, K. Yong, *Chem. Commun.*, 2010, **46**, 5521
- SI 2. M. Seol, E. Ramasamy, J. Lee, K. Yong, *J. Phys. Chem. C*, 2011, **115**, 22018
- SI 3. C.-Z. Yao, B.-H. Wei, L.-X. Meng, H. Li, Q.-J. Gong, H. Sun, H.-X. Ma, X.-H. Hu, *J. Power Sources*, 2012, **207**, 222
- SI 4. T. Bora, H. H. Kyaw, J. Dutta, *Electrochim. Acta*, 2012, **68**, 141
- SI 5. J. Tian, Q. Zhang, E. Uchaker, R. Gao, X. Qu, S. Zhang, G. Cao, *Energy Environ. Sci.*, 2013, **6**, 3542
- SI 6. J. Chen, J. Wu, W. Lei, J. L. Song, W. Q. Deng, X. W. Sun, *Appl. Surf. Sci.*, 2010, **256**, 7438
- SI 7. L. Luo, G. Lv, B. Li, X. Hu, L. Jin, J. Wang, Y. Tang, *Thin Solid Films*, 2010, **518**, 5146
